# Supplementary material for: Dispersion stability of chemically reduced graphene oxide nanoribbons in organic solvents
Source: Royal Society of Chemistry journal article supplement (doi:10.1039/c5ra23801c), 2016-01-01
Supplement: c5ra23801c1.pdf [file c5ra23801c1.pdf]

## Supporting Information

### Dispersion stability of chemically reduced graphene oxide nanoribbon in organic solvents

Min Yeong Song,<sup>†</sup> Young Soo Yun,<sup>†</sup> Na Rae Kim, and Hyoung-Joon Jin<sup>\*</sup>

*Department of Polymer Science and Engineering, Inha University, Incheon 402-751,  
Republic of Korea*

<sup>†</sup>These authors contributed equally to this work.

<sup>\*</sup>Author to whom correspondence should be addressed.

E-mail address: [hjjin@inha.ac.kr](mailto:hjjin@inha.ac.kr)

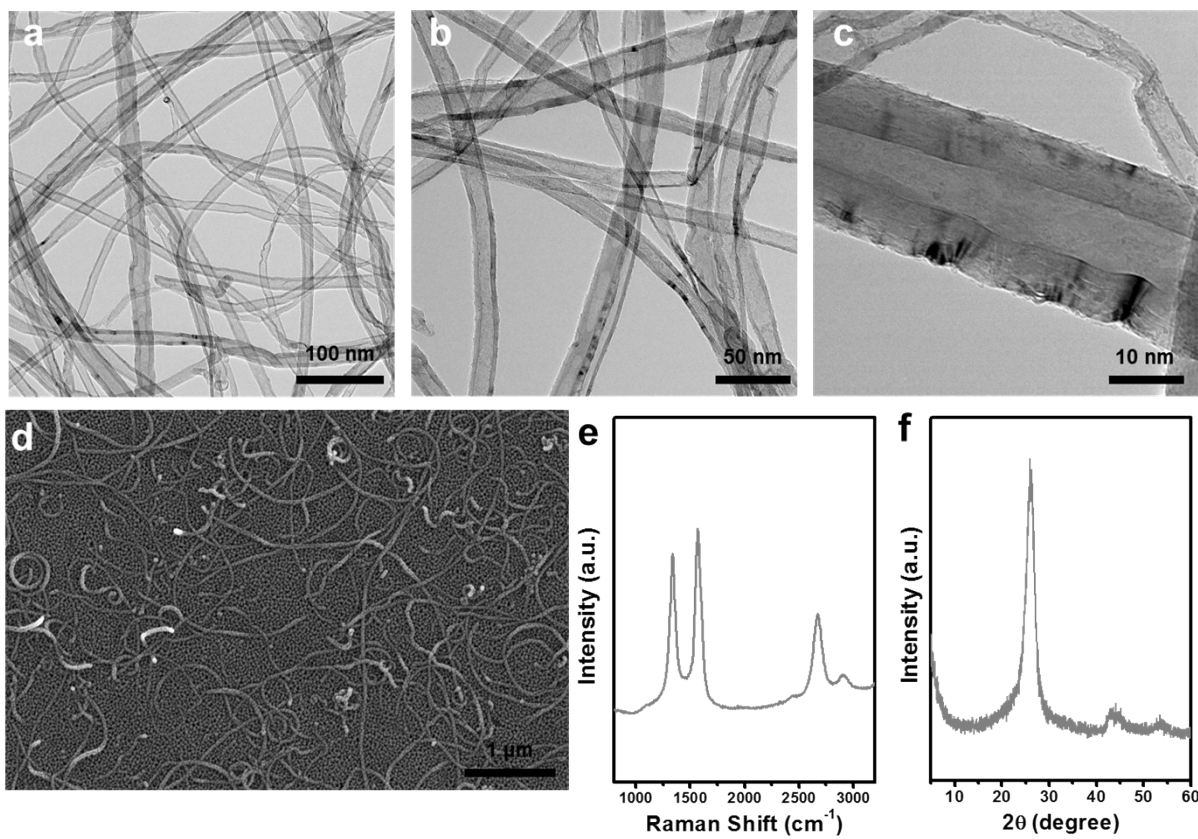

**Figure S1.** (a), (b), (c) FE-TEM images of MWCNTs with different magnifications. (d) FE-SEM image of MWCNTs. (e) Raman spectrum and (f) XRD pattern of MWCNTs.

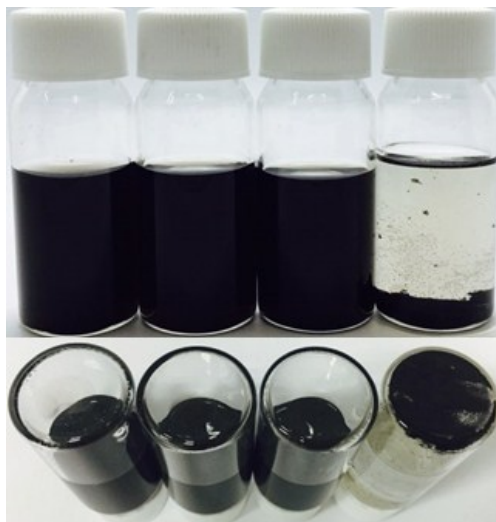

**Figure S2.** Photograph of 0.01 wt.% GONRs dispersions in water, DMF, NMP and toluene after three months since ultrasound-treated (From left : water, DMF, NMP, toluene).

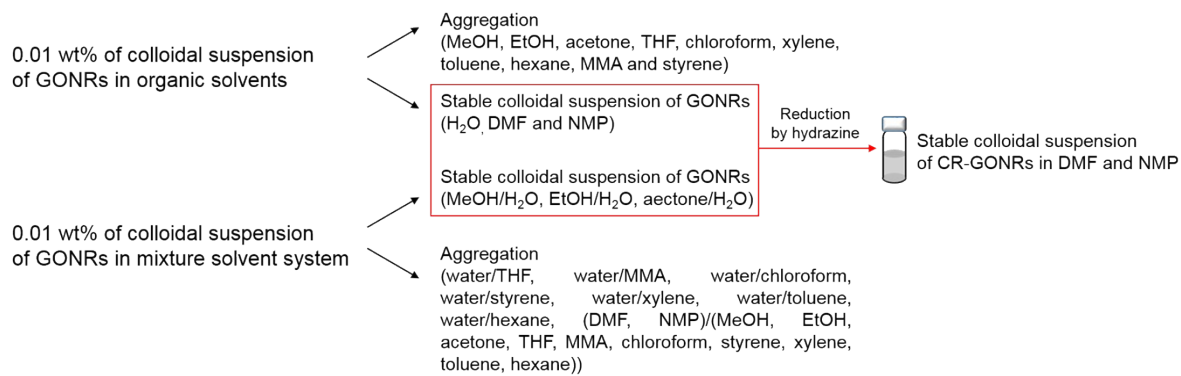

**Figure S3.** Schematic for the dispersion behaviors and chemical reduction process of GONRs.

**Table S1.** Zeta potential values of GONRs and CR-GONRs measured in various solvents.

| Sample name                                | Zeta potential (mV) |
|--------------------------------------------|---------------------|
| GONRs in H <sub>2</sub> O                  | -43.8               |
| CR-GONRs in DMF                            | -40.2               |
| CR-GONRs in H <sub>2</sub> O/DMF (9:1 wt%) | -30.1               |
| CR-GONRs in MeOH/DMF (9:1 wt%)             | -36.3               |
| CR-GONRs in Xylene/DMF (9:1 wt%)           | -38.1               |
